# Supplementary material for: Metabolic Disturbance and Th17/Treg Imbalance Are Associated With Progression of Gingivitis
Source: PubMed Central journal article supplement (PMC8257051; doi:10.3389/fimmu.2021.670178), 2021-06-21

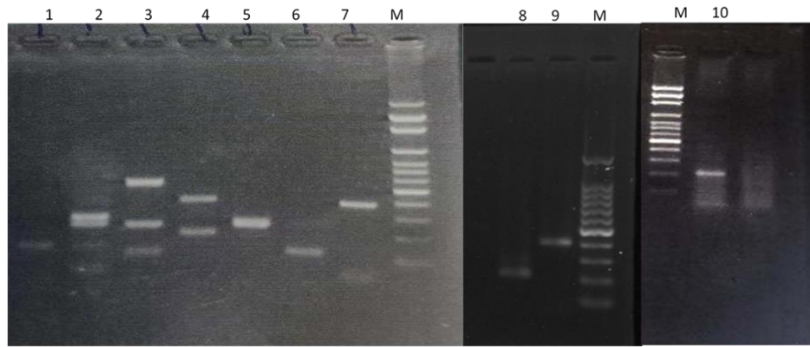

**FIGURE S1** | The electrophoresis identification picture of the amplified product of qRT-PCR. M: marker. 1: GAPDH-1. 2-4: The products amplified by the primers have non-specific bands, which were not included in the experiment. 5: Foxp3-1. 6: TGF- $\beta$ . 7: Foxp3-2. 8: IL-17A. 9: GAPDH-2. 10: RORC.

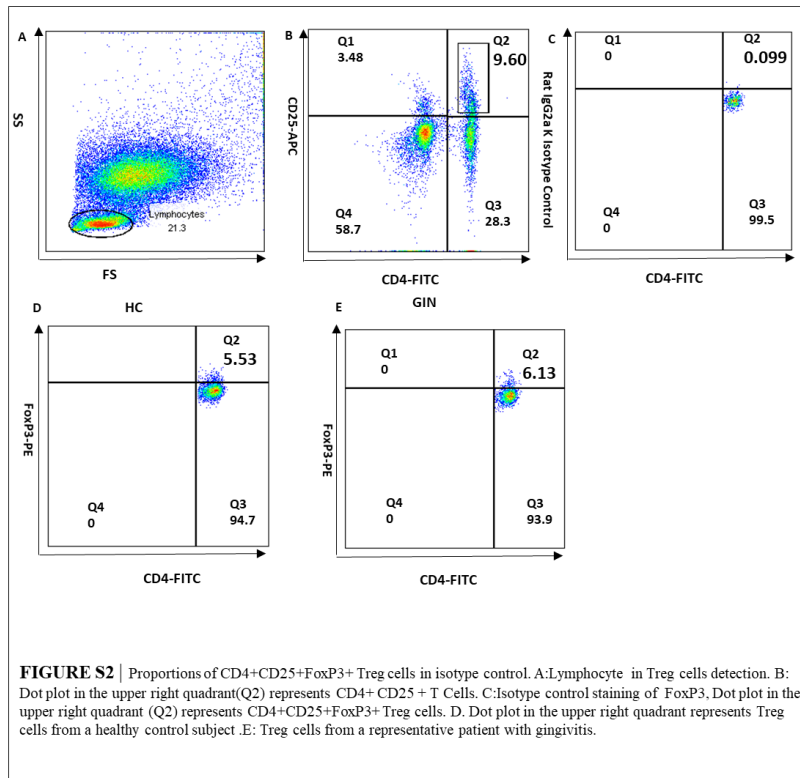

**FIGURE S2** | Proportions of CD4+CD25+FoxP3+ Treg cells in isotype control. A: Lymphocyte in Treg cells detection. B: Dot plot in the upper right quadrant (Q2) represents CD4+ CD25+ T Cells. C: Isotype control staining of FoxP3. Dot plot in the upper right quadrant (Q2) represents CD4+CD25+FoxP3+ Treg cells. D: Dot plot in the upper right quadrant represents Treg cells from a healthy control subject. E: Treg cells from a representative patient with gingivitis.

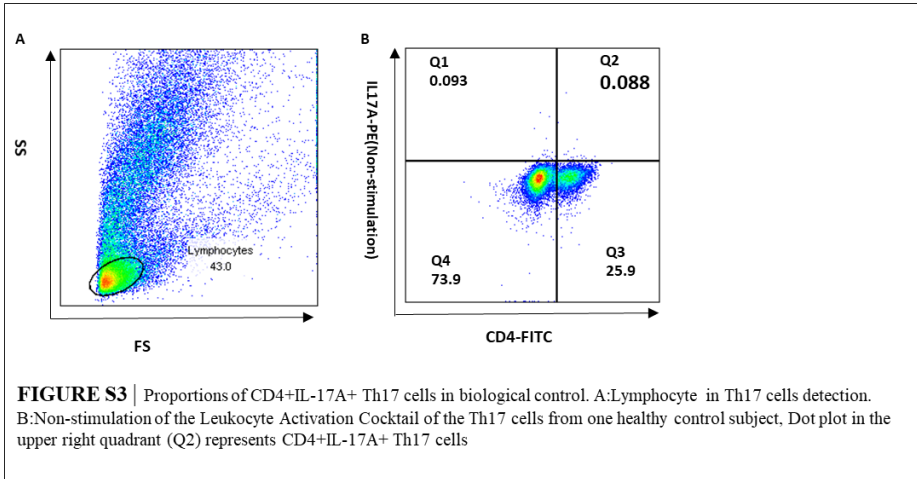

Supplement: DataSheet_1.pdf [file DataSheet_1.pdf]
